# Supplementary material
Source: Springer Nature journal article supplement (https://www.springermedizin.de/resource/supplementary/12958_2006_295_MOESM5_ESM.pdf/9567564)

A)

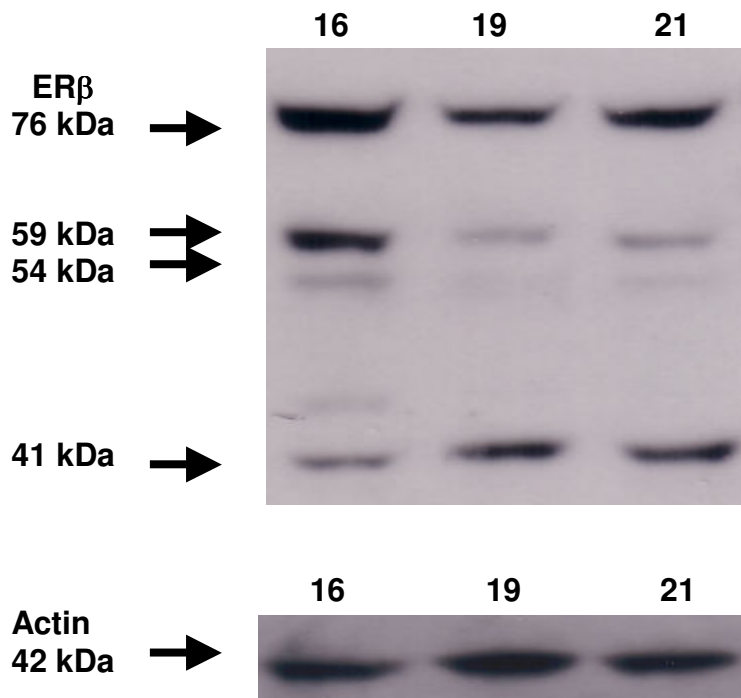

B)

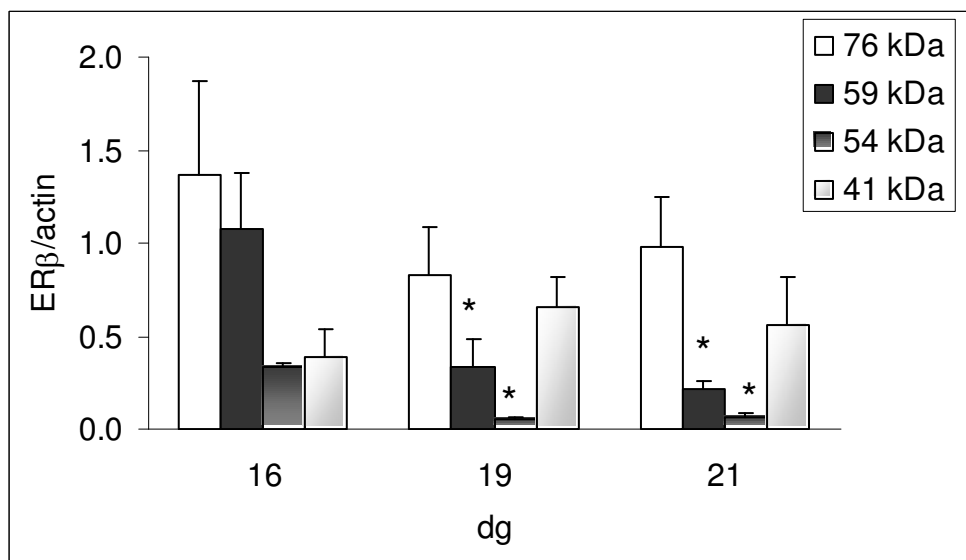

Supplement: MOESM5 [file 9567564]
